# Supplementary material for: Oxidation of chlorinated alkanes over Co3O4/SBA-15 catalysts. Structural characterization and reaction mechanism
Source: Royal Society of Chemistry journal article supplement (doi:10.1039/c6cy00321d), 2016-01-01
Supplement: c6cy00321d1.pdf [file c6cy00321d1.pdf]

## 19 CAPTIONS FOR FIGURES

20 Figure S1. Ratio  $I_{565}/I_{1089}$ , and  $I_{661}/I_{1089}$  at increasing cobalt oxide contents (arbitrary  
21 units) (Co-O bands/Si-O band ratio).

22 Figure S2. FTIR subtraction spectra of surface species arising from low temperature  
23 CO adsorption.

24 Figure S3. FTIR subtraction spectra of surface species arising from DCP adsorption  
25 and reaction (without air).

26 Figure S4. FTIR subtraction spectra of gas phase species arising from DCP adsorption  
27 and reaction (without air).

28 Figure S5. FTIR surface spectra of sample 30Co/SBA following DCP oxidation  
29 (without air).

31

32

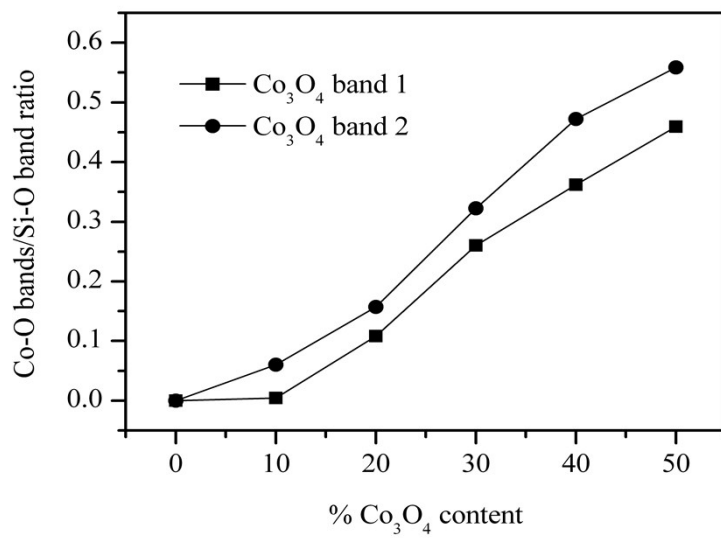

33

34

FIGURE S1

36

37

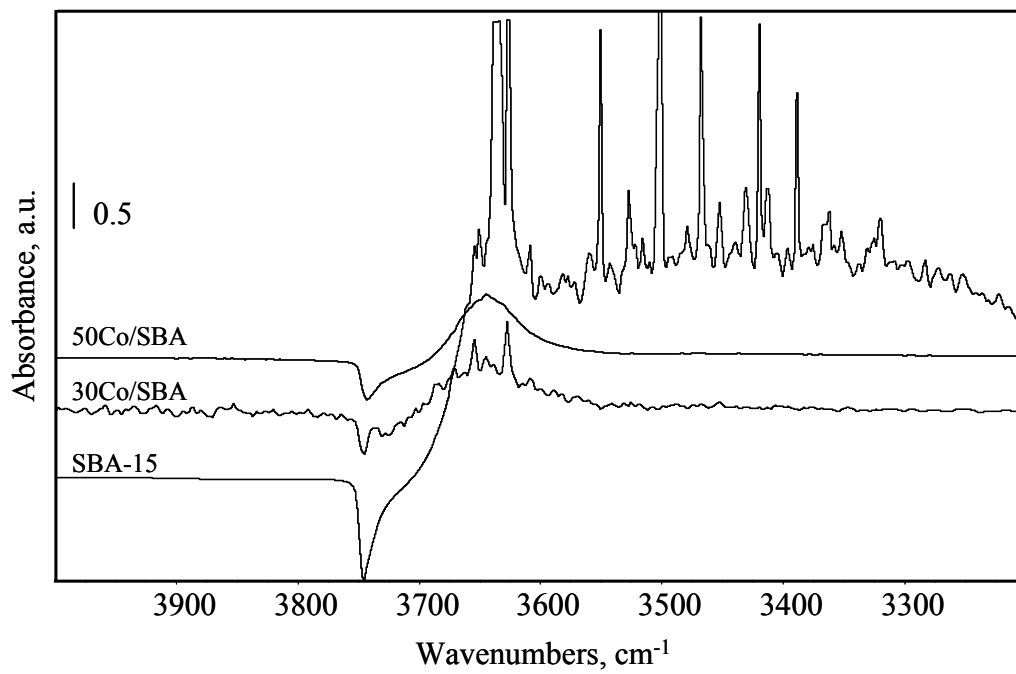

38

39

FIGURE S2

41

42

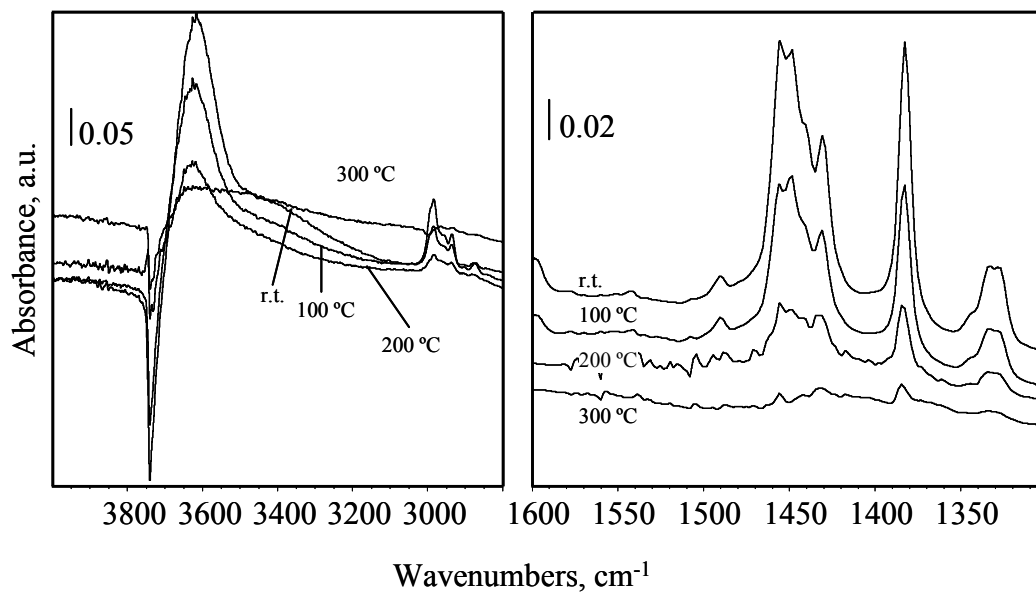

43

44

FIGURE S3

46

47

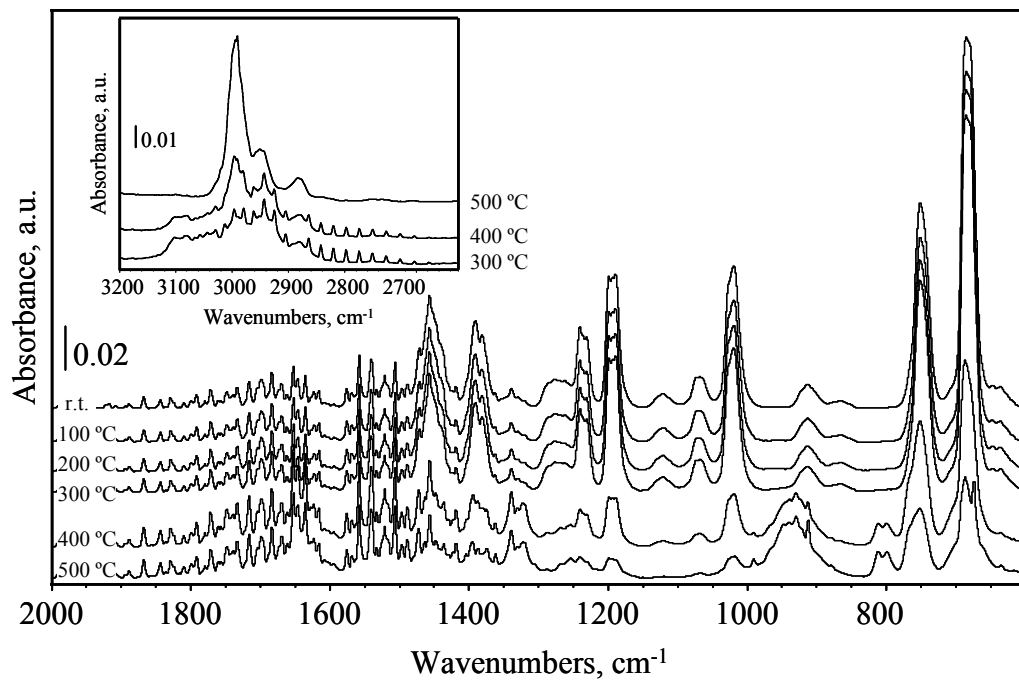

48

49

FIGURE S4

51

52

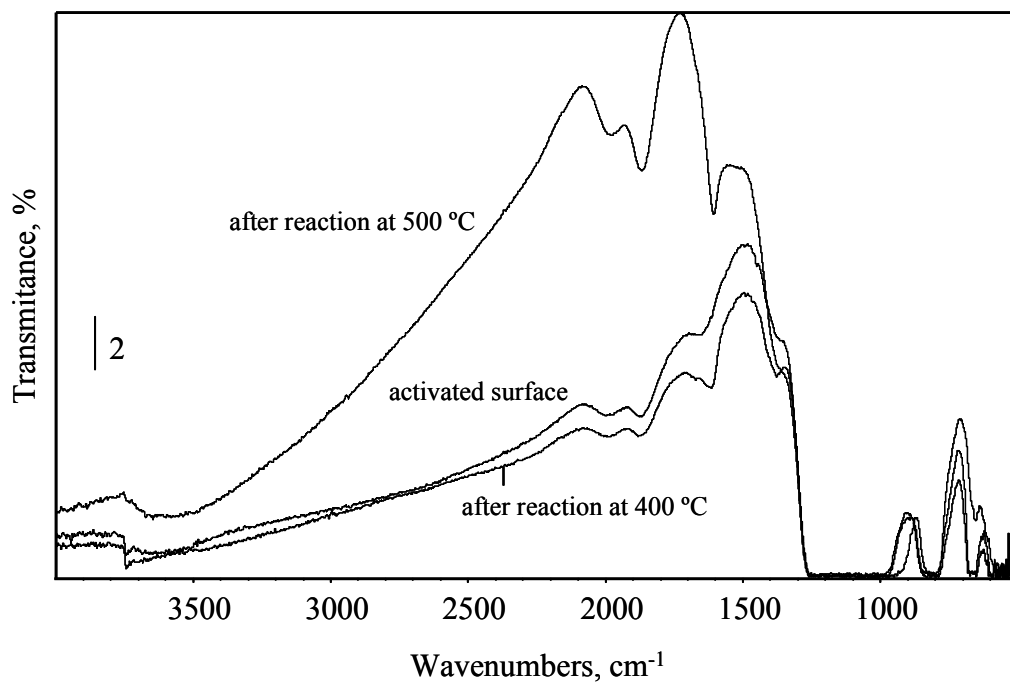

53

54

FIGURE S5
